# Supplementary material
Source: Springer Nature journal article supplement (https://www.springermedizin.de/resource/supplementary/12889_2012_5364_MOESM3_ESM.pdf/9495168)
Supplement: MOESM3 [file 9495168]

## POLICY MAKERS AND GOVERNMENTS

Policy networks and advisory groups

Municipal Governments

- Unions of municipalities
- Municipal insurance associations
- City councils
  - Elected officials
  - Citizen's Advisory Committees

Departments of:

- Legal services
- Community services
- Engineering and transportation
- Human resource services
- Sustainability
- Parks and recreation

Provincial Governments

- Elected officials
- Ministry of:
  - Children and family
  - Community and culture
  - Health
  - Social Development
  - Transportation / infrastructure
  - Energy and mines

Health Authorities

Federal Government

- Elected officials
- Ministry of:
  - Health
  - State (Seniors)
  - Human resources development
  - Industry (Building codes)

## PRIVATE BUSINESS

Chambers of commerce

Health and social service suppliers

- Mobility aids
- Alternative transportation

Land Use

- Developers
- Real estate

Infrastructure

- Material manufacturers
- Construction companies

## RESEARCH COMMUNITY

Research Centres and networks

- Post-secondary institutions

Health Professions

- Medicine
- Nursing
- Physiotherapy
- Occupational Therapy
- Kinesiology
- Public Health
- Social Work
- Psychology

Gerontology and ageing studies

Health services

Social inequities in health

Architecture

Planning

Urban design

Engineering

Technology and society studies

Transportation

Health geography

Environmental geography

Social and economic policy

## PUBLIC

Older adults

Families and caregivers

Taxpayers (community members)

## CIVIL SOCIETY ORGANIZATIONS

Non-governmental organizations

- Interest groups
- Think tanks
- Charitable organizations
  - Disease specific
  - Disability oriented
  - Community oriented
  - Sustainability oriented

Faith-based organizations

Indigenous / ethnic groups

## PRACTITIONERS AND PROFESSIONALS

Inter-professional networks and advisory groups

Health Professions

- Medicine
- Nursing
- Physiotherapy
- Occupational Therapy
- Kinesiology
- Public Health
- Social Work
- Psychology
- Pharmacology

Gerontology and ageing studies

Health services

Social inequities in health

Architecture

Planning

Urban design

Building trades

Engineering

Technology and society studies

Transportation

Health geography

Environmental geography

Social and economic policy

## HEALTH AND SOCIAL SERVICE PROVIDERS

Housing and accommodations

- Assisted living
- Residential care
- Sustainable housing
- Mortgage corporations

Health insurance providers

- Occupational health and safety
- Provincial medical service plans

Disability Services

Safety and crime prevention

Transportation

Maintenance of public spaces
